# Supplementary material for: Tertiary lymphoid structure stratifies glioma into three distinct tumor subtypes
Source: Aging (Albany NY). 2021 Dec 26;13(24):26063–94. doi: 10.18632/aging.203798 (PMC8751592; doi:10.18632/aging.203798)
Supplement: Supplementary Figures [file aging-13-203798-s001.pdf]

## SUPPLEMENTARY FIGURES

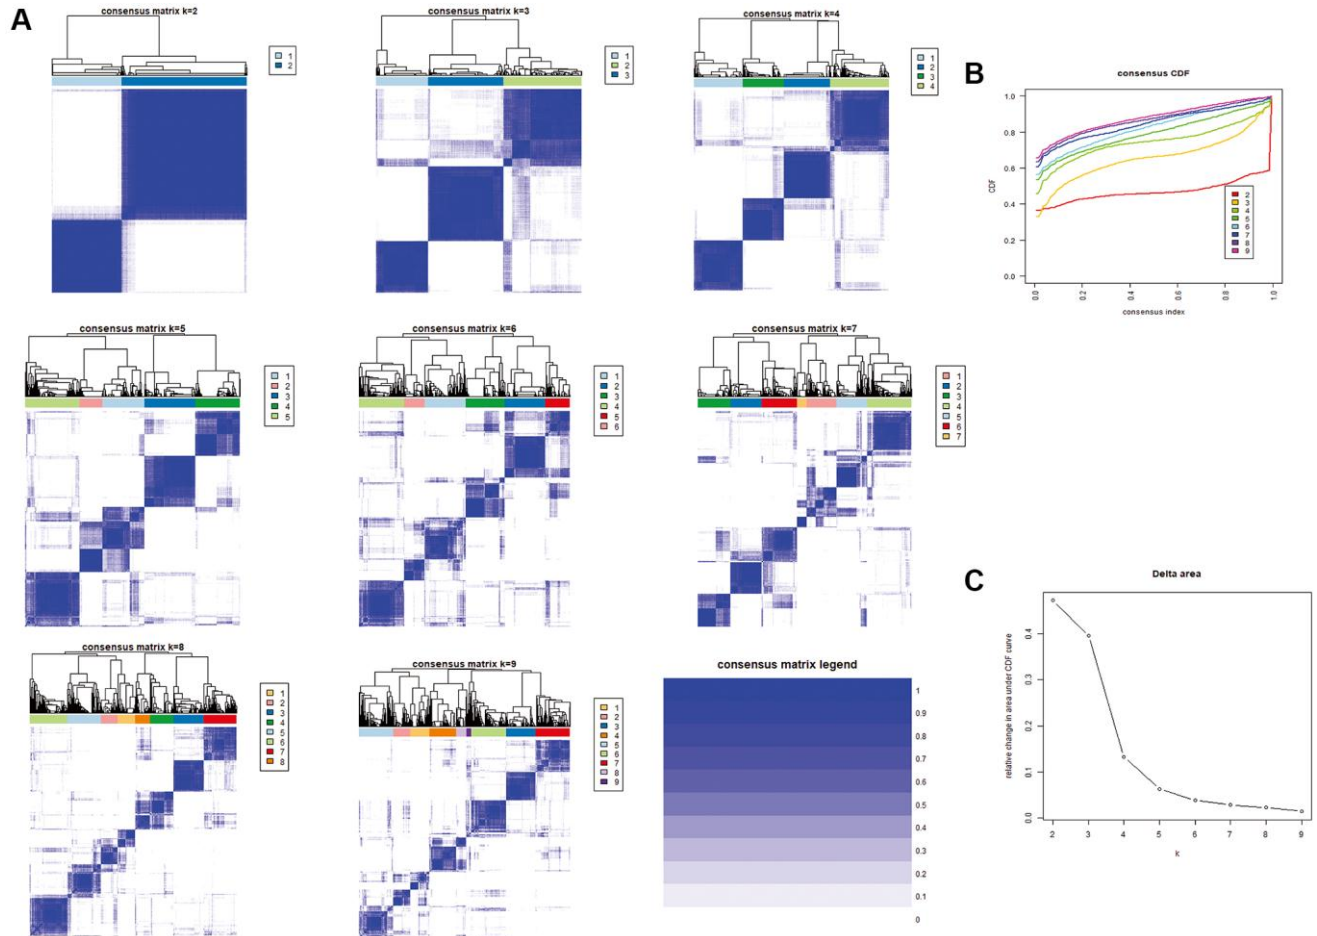

**Supplementary Figure 1. Consensus clustering based in TLS gene expression of TCGA glioma. (A)** Clustering matrix for  $k = 2$  to  $k = 9$ . **(B)** CDF (cumulative distribution function) curve for  $k = 2$  to  $k = 10$ . **(C)** Relative change in area under CDF curve for  $k = 2$  to  $k = 10$ .

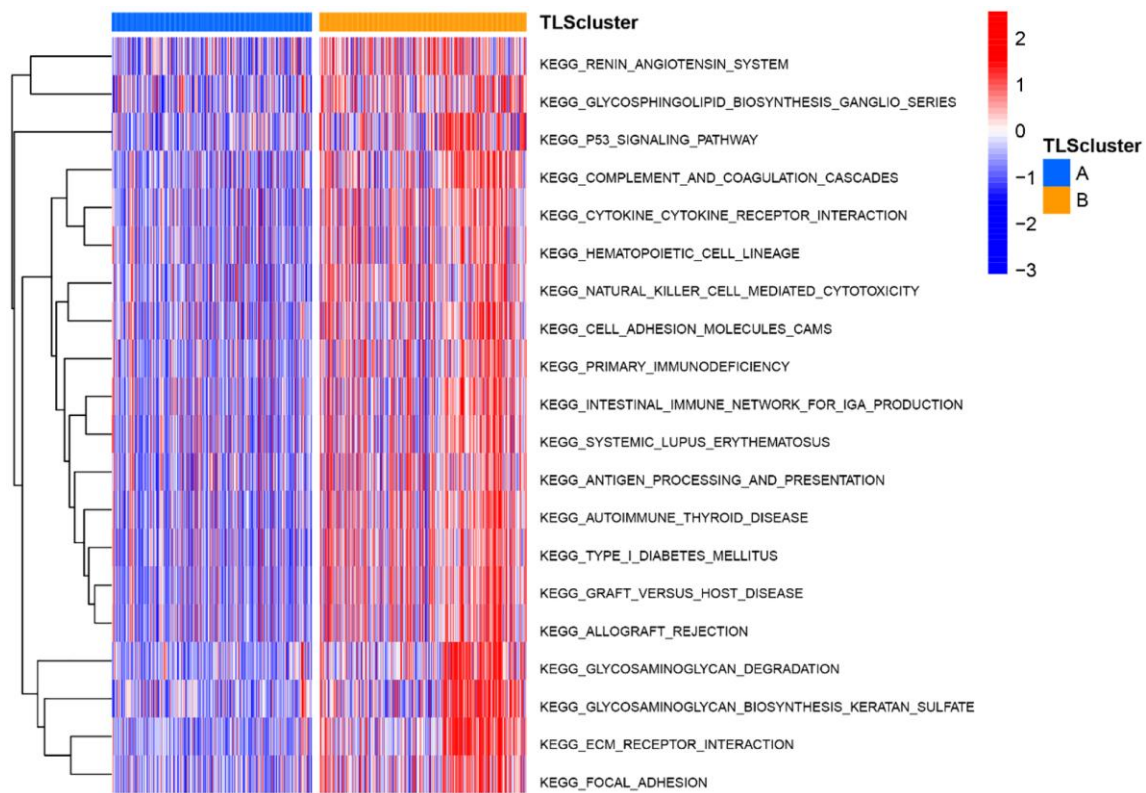

**Supplementary Figure 2. The top 20 potential biological functions between subtype A and B in TCGA.**

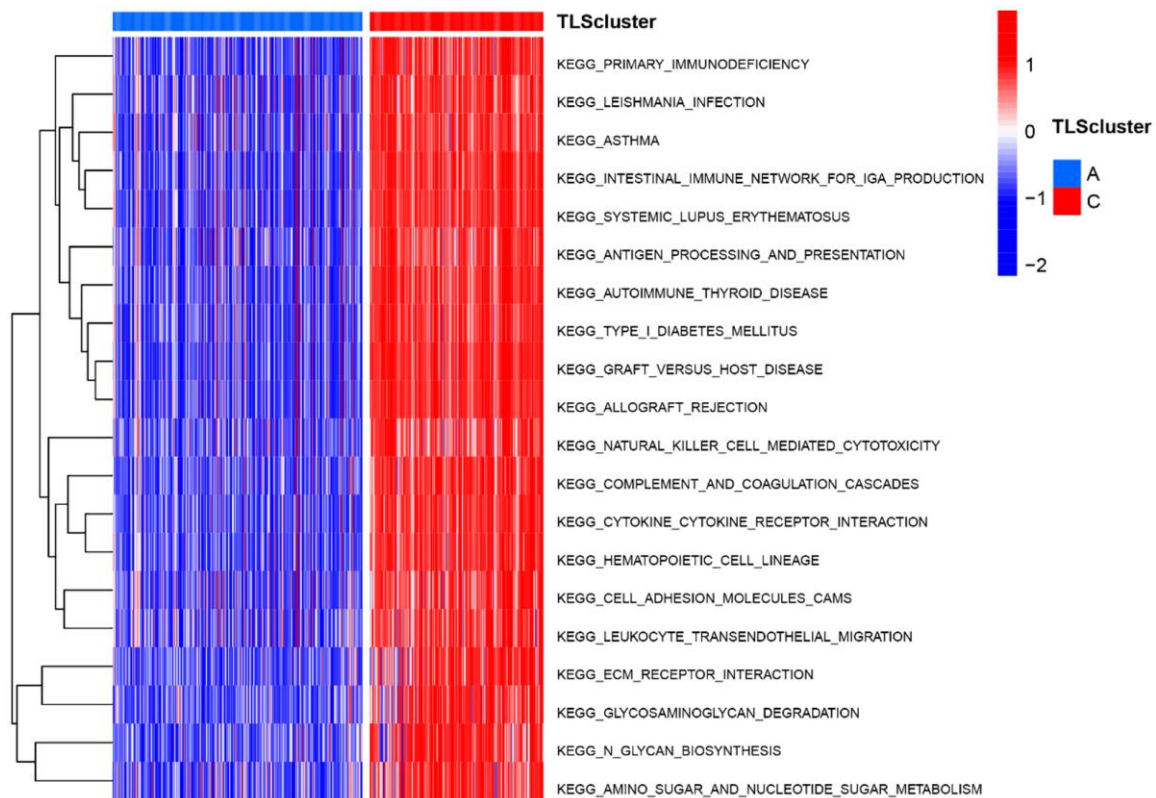

**Supplementary Figure 3. The top 20 potential biological functions between subtype A and C in TCGA.**

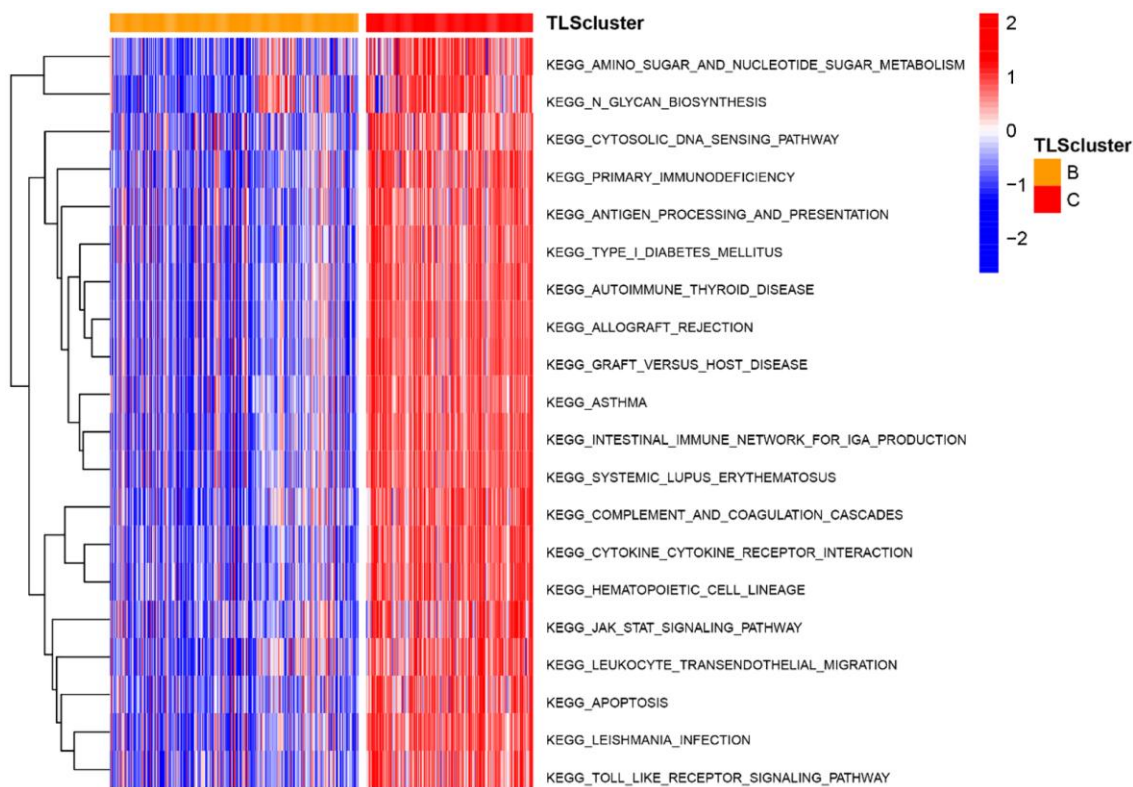

**Supplementary Figure 4. The top 20 potential biological functions between subtype B and C in TCGA.**

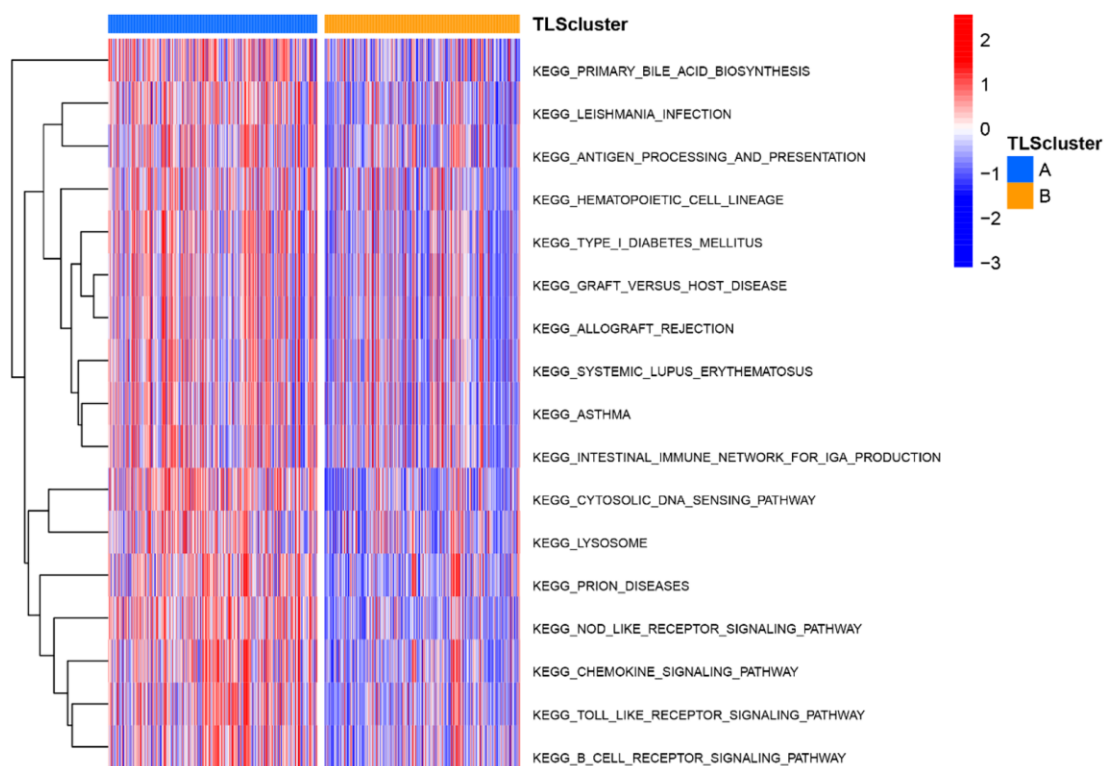

**Supplementary Figure 5. The top 20 potential biological functions between subtype A and B in CGGA\_cohort1.**

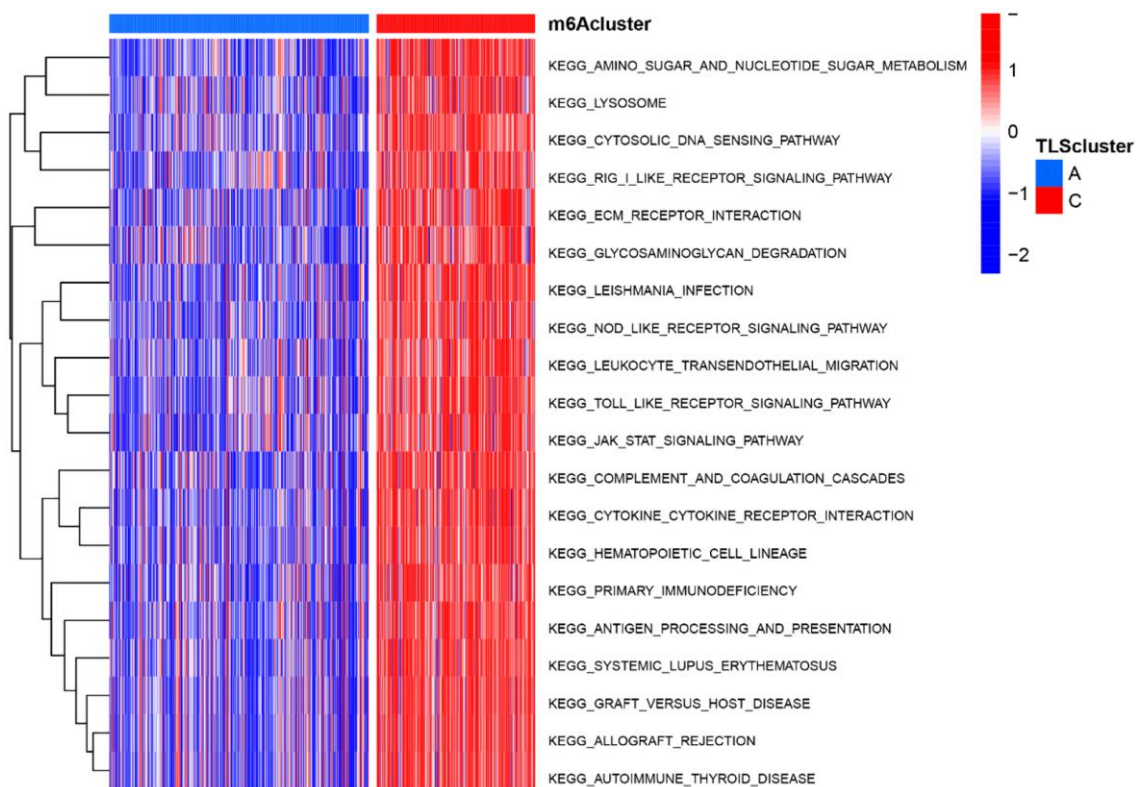

Supplementary Figure 6. The top 20 potential biological functions between subtype A and C in CGGA\_cohort1.

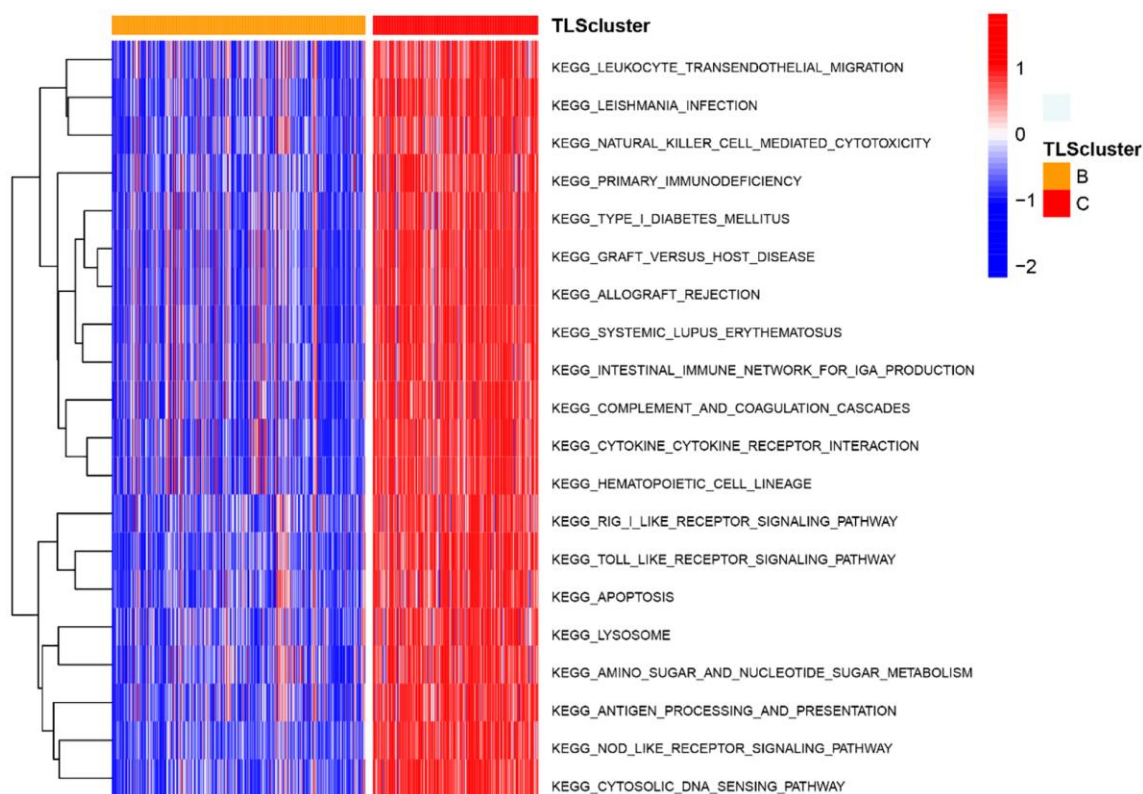

Supplementary Figure 7. The top 20 potential biological functions between subtype B and C in CGGA\_cohort1.

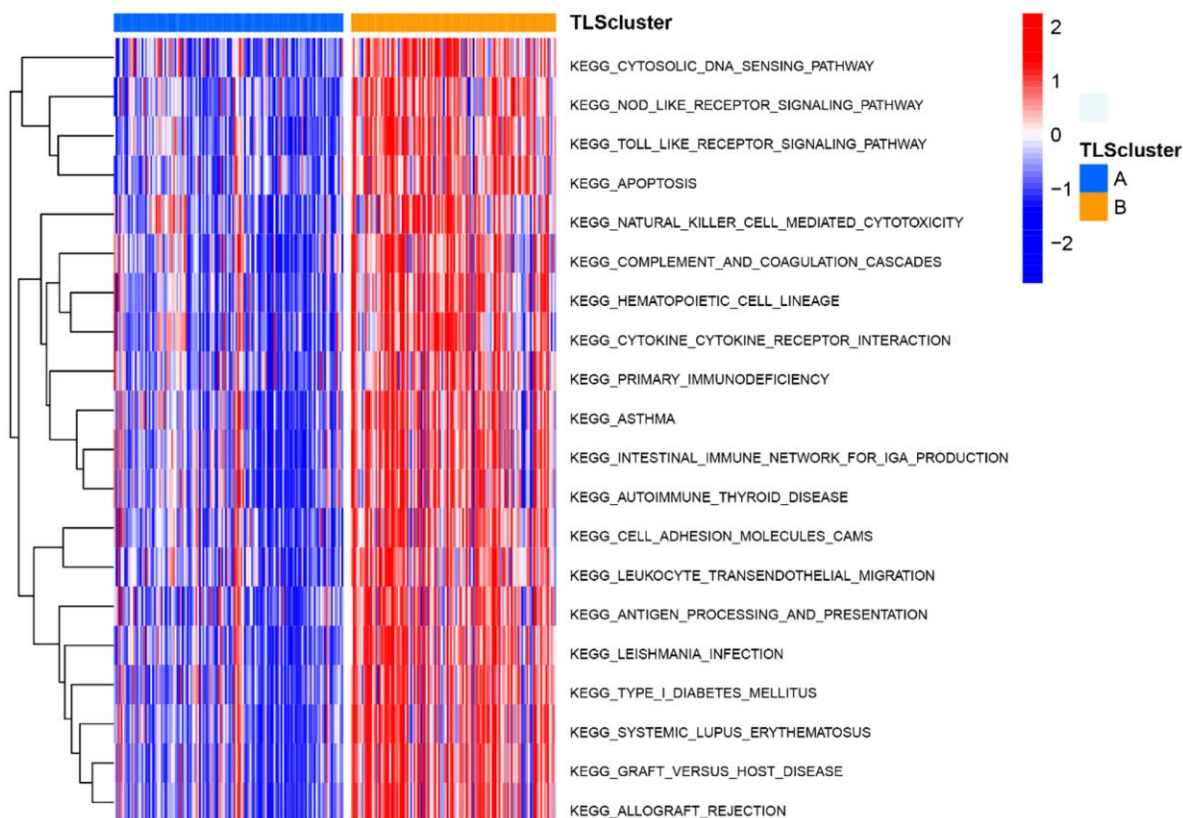

**Supplementary Figure 8. The top 20 potential biological functions between subtype A and B in CGGA\_cohort2.**

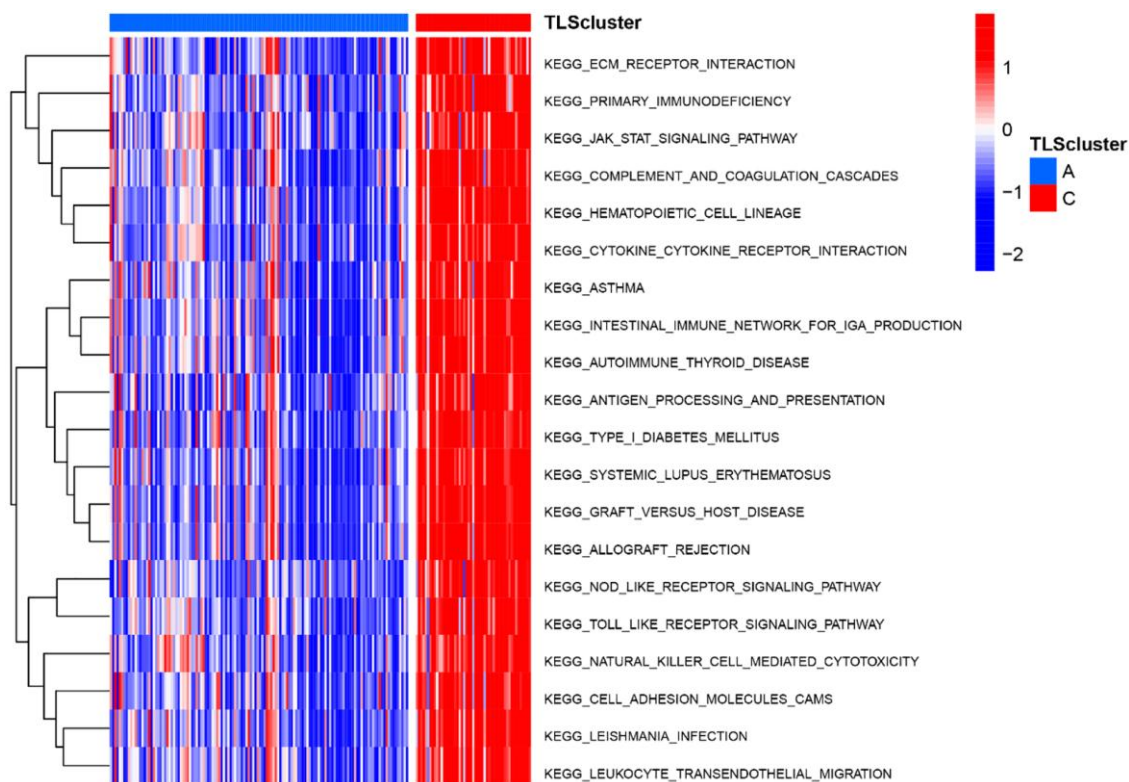

**Supplementary Figure 9. The top 20 potential biological functions between subtype A and C in CGGA\_cohort2.**

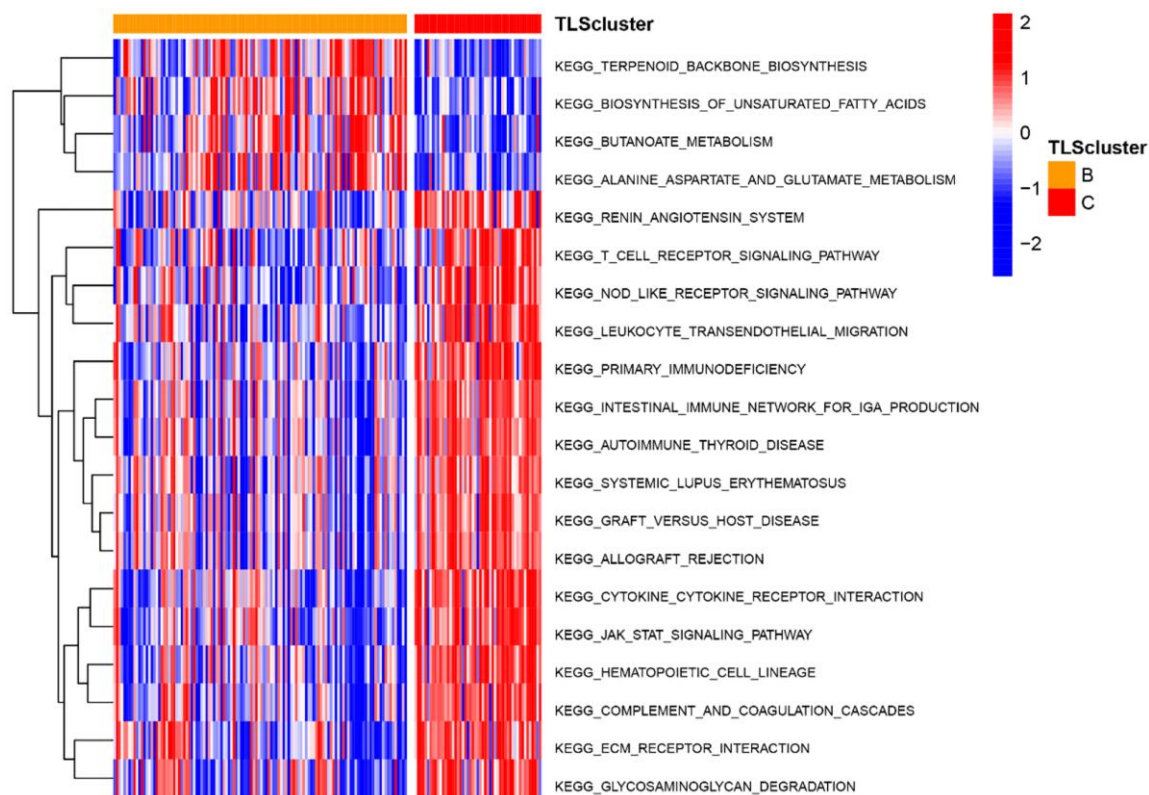

**Supplementary Figure 10. The top 20 potential biological functions between subtype B and C in CGGA\_cohort2.**

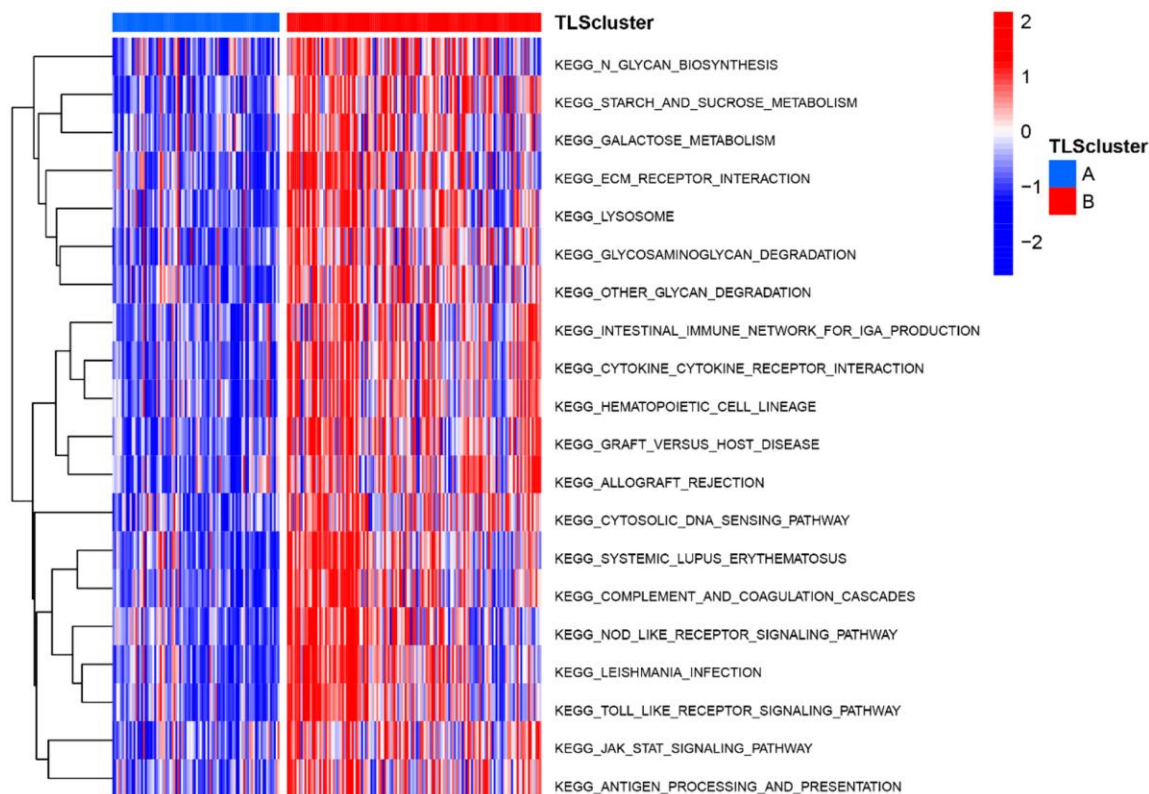

**Supplementary Figure 11. The top 20 potential biological functions between subtype A and B in GSE16011.**

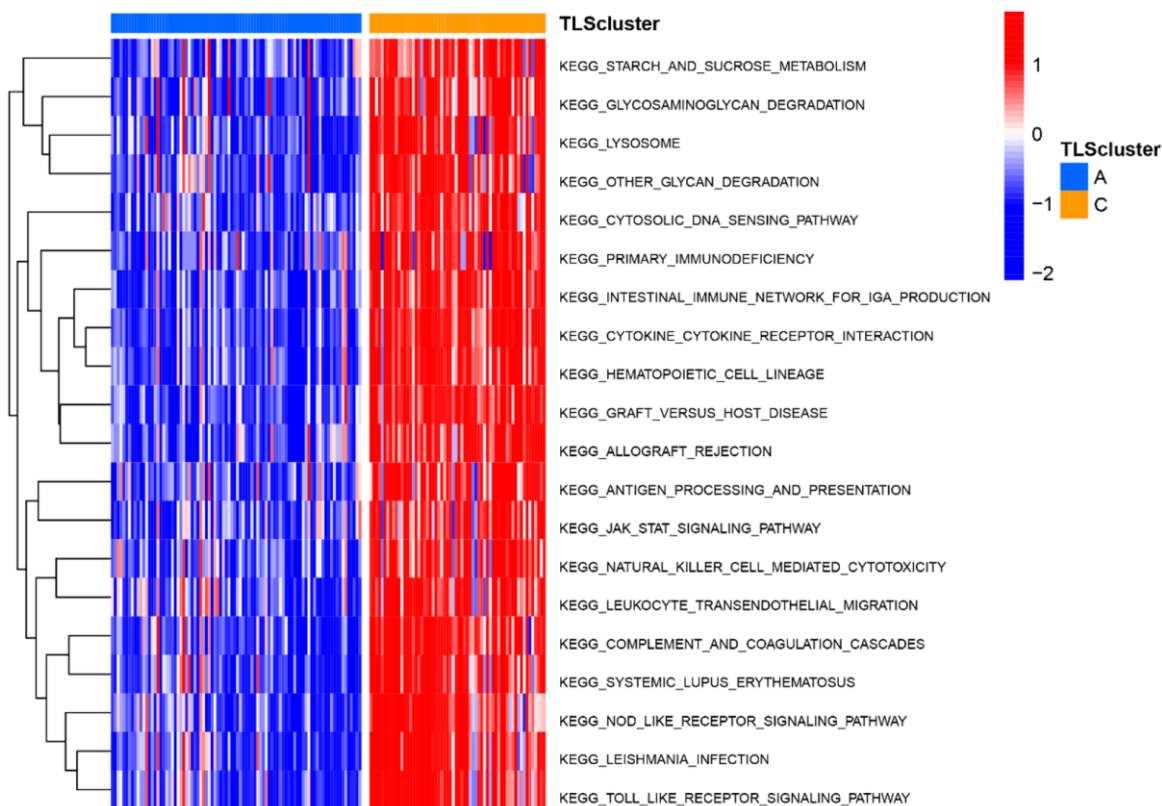

**Supplementary Figure 12. The top 20 potential biological functions between subtype A and C in GSE16011.**

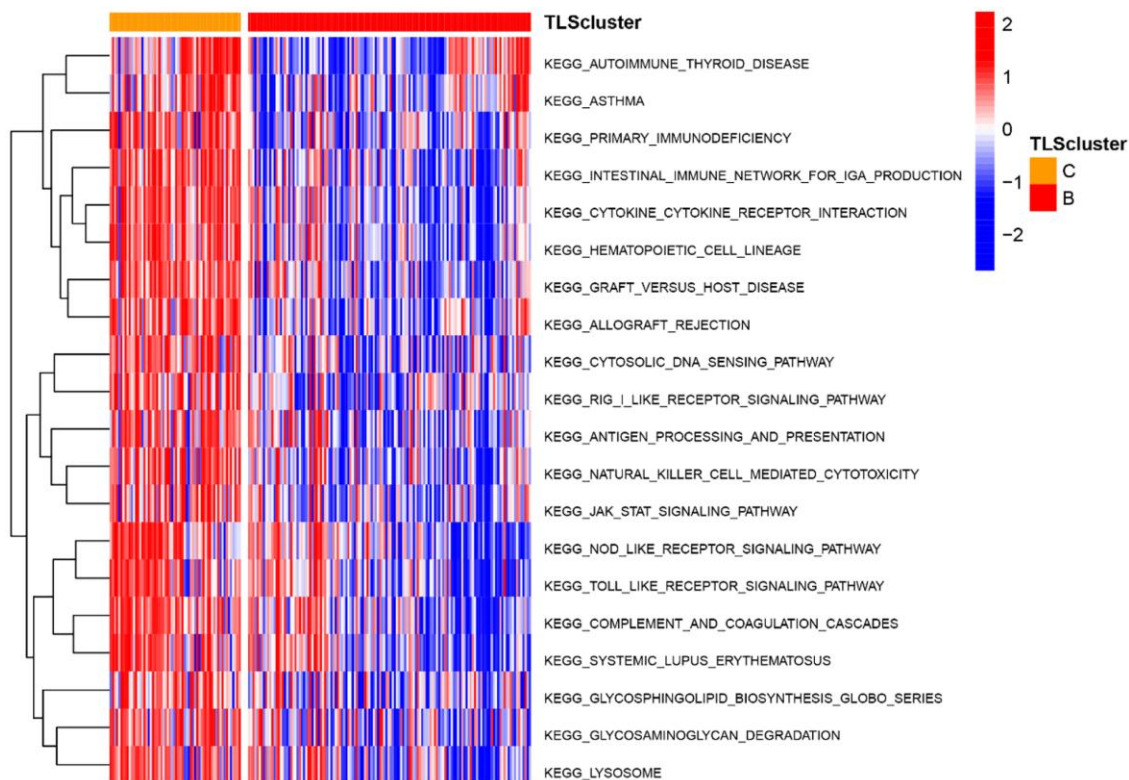

**Supplementary Figure 13. The top 20 potential biological functions between subtype B and C in GSE16011.**

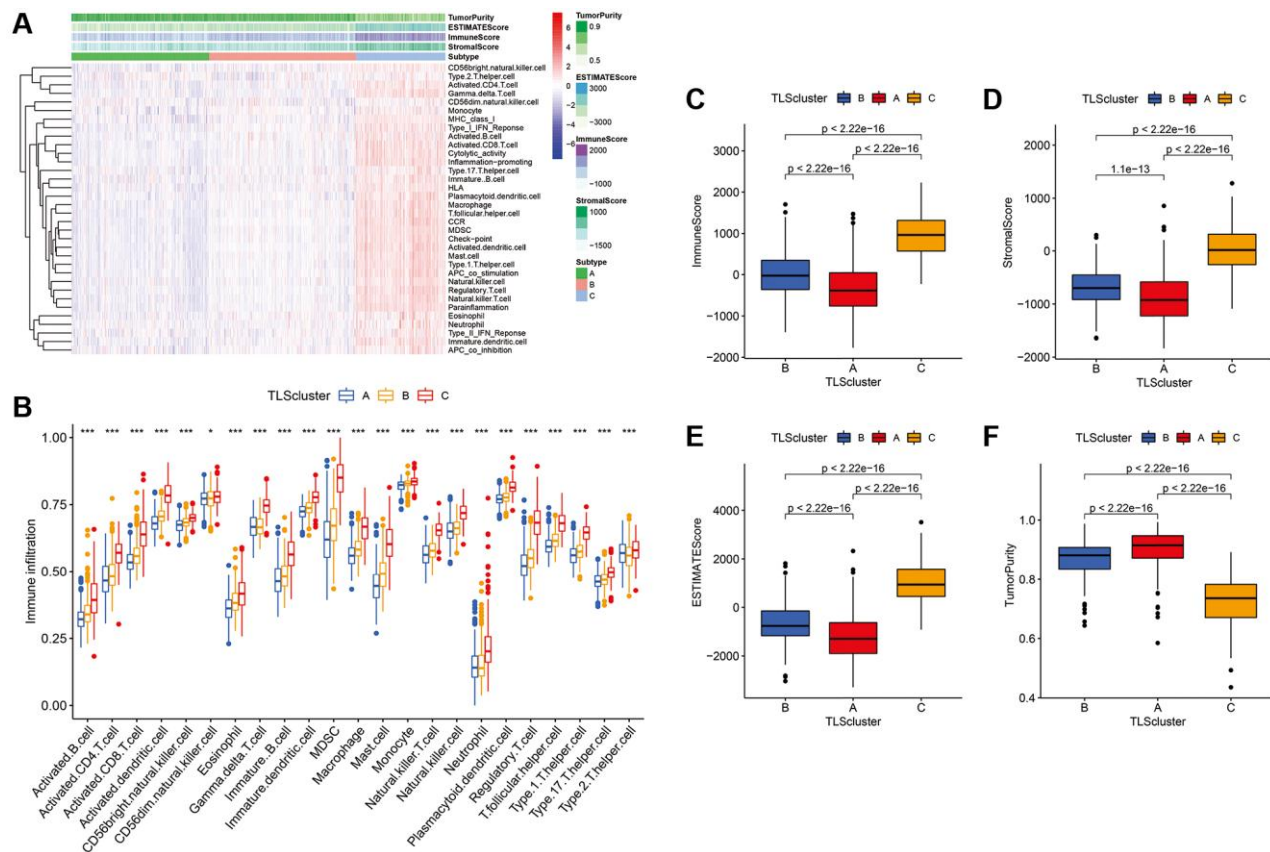

**Supplementary Figure 14. Immune infiltration and tumor microenvironment of three metabolic subtypes in CGGA\_cohort1.** (A) Heatmap of TLS subtypes associated with immune infiltration and immune function. (B) The signature of 23 immune cell among TLS subtypes. (C–F) tumor microenvironment of TLS subtypes. C subtype had higher immune, stromal, and ESTIMATE scores compared with the scores of the A and B subtypes; however, tumor purity was lower.

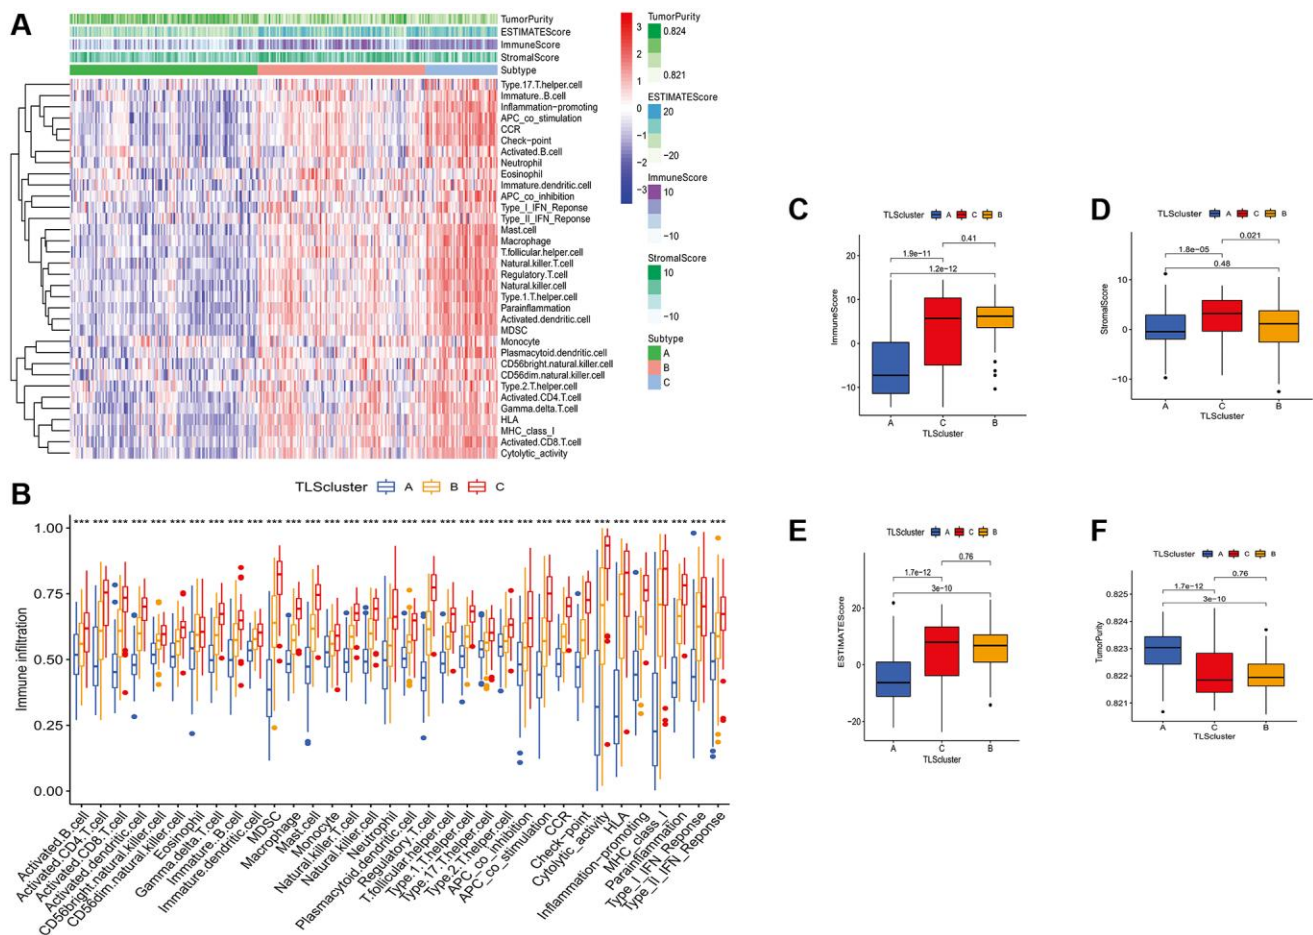

**Supplementary Figure 15. Immune infiltration and tumor microenvironment of three metabolic subtypes in CGGA\_cohort2.** (A) Heatmap of TLS subtypes associated with immune infiltration and immune function. (B) The signature of 23 immune cell among TLS subtypes. (C–F) tumor microenvironment of TLS subtypes. C subtype had higher immune, stromal, and ESTIMATE scores compared with the scores of the A and B subtypes; however, tumor purity was lower.

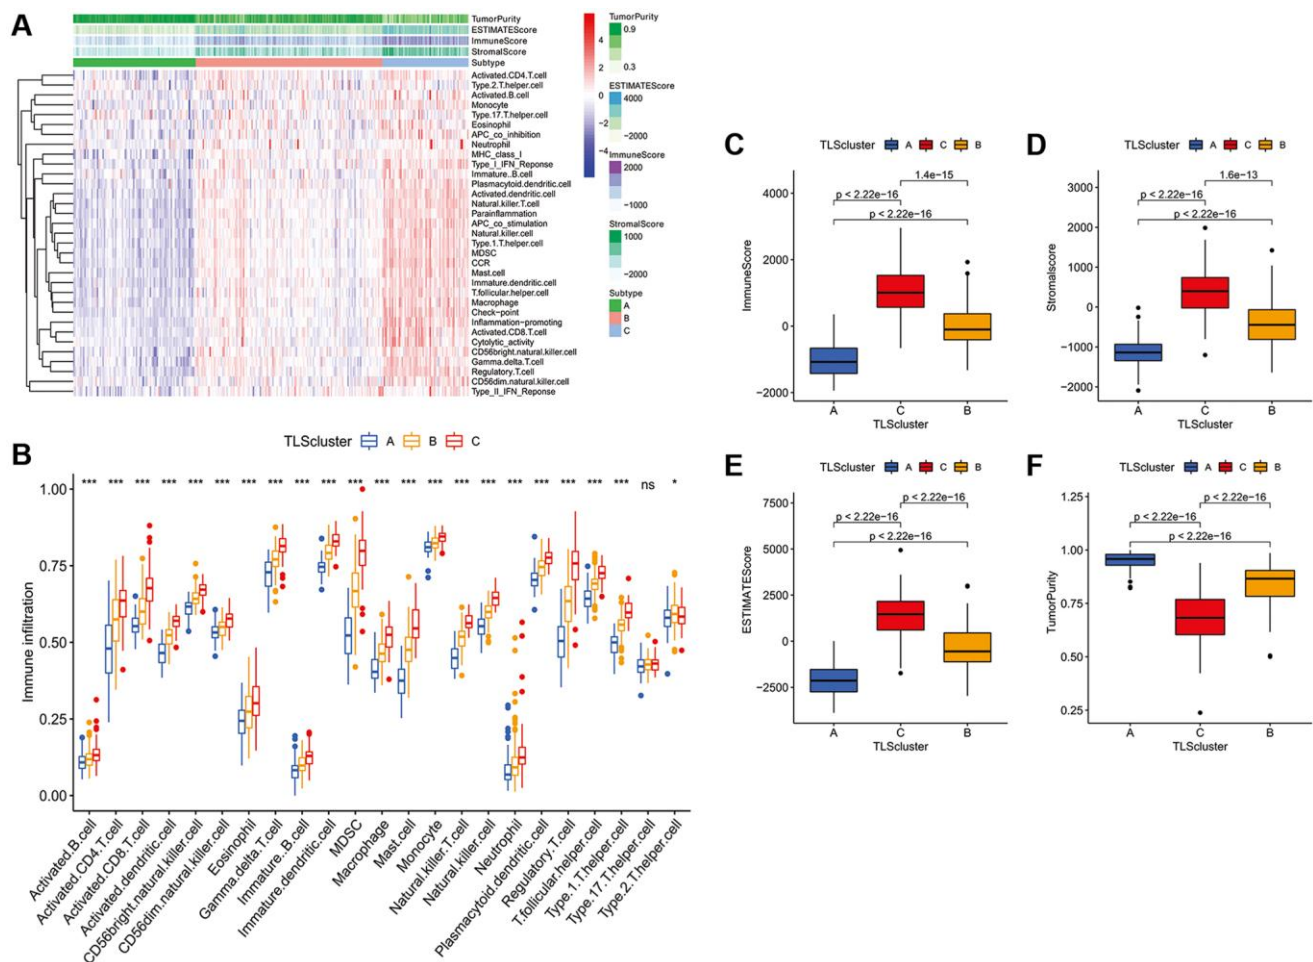

**Supplementary Figure 16. Immune infiltration and tumor microenvironment of three metabolic subtypes in GSE16011.** (A) Heatmap of TLS subtypes associated with immune infiltration and immune function. (B) The signature of 23 immune cell among TLS subtypes. (C–F) tumor microenvironment of TLS subtypes. C subtype had higher immune, stromal, and ESTIMATE scores compared with the scores of the A and B subtypes; however, tumor purity was lower.

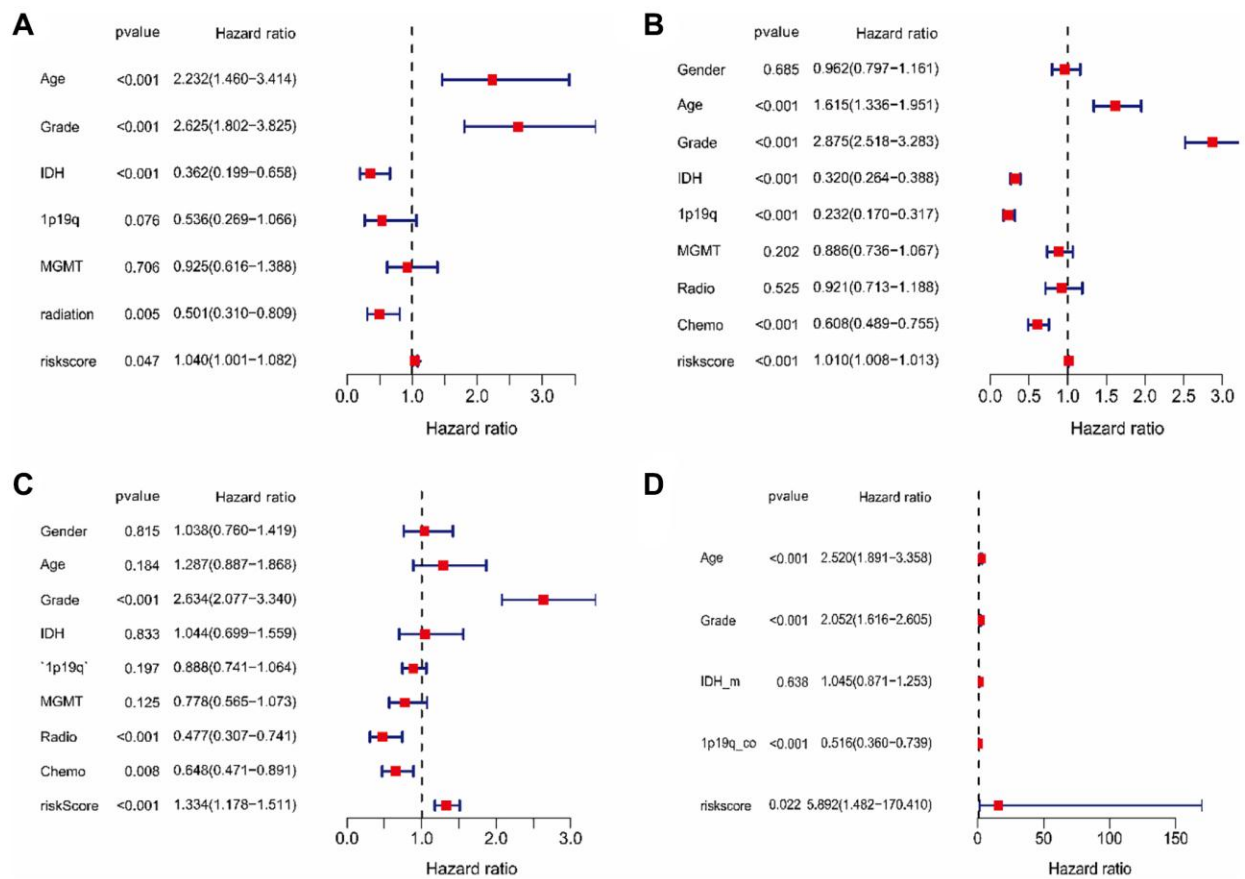

**Supplementary Figure 17.** Multivariate Cox regression analysis of riskScore in TCGA cohort (A), CGGA\_cohort1 (B), CGGA\_cohort2 (C) and GSE16011 (D).
